# Supplementary material for: Long-term care use and socio-economic status in Belgium: a survival analysis using health care insurance data
Source: Arch Public Health. 2013 Jan 3;71(1):1. doi: 10.1186/0778-7367-71-1 (PMC3552700; doi:10.1186/0778-7367-71-1)
Supplement: Additional file 1 — Cox_regressies. [file 0778-7367-71-1-S1.xlsx]

## Sheet: copd
Dependent variable: COPD
	Sex = M									Sex = F
Number	of	strata	=	39	Number of obs	=	514986		Number	of	strata	=	40	Number of obs	=	692912
Number	of	PSUs	=	30609	Population size	=	514986		Number	of	PSUs	=	38675	Population size	=	692912
					Design df	=	30570							Design df	=	38635
					F( 59, 30512)	=	6.09							F( 60, 38576)	=	5.79
					Prob > F	=	0							Prob > F	=	0
copd	Coef.	Std. Err. (linearized)	t	P>t	[95% Conf.	Interval]			copd	Coef.	Std. Err. (linearized)	t	P>t	[95% Conf.	Interval]
age									age
66	-0.19525	0.135279	-1.44	0.149	-0.460403	0.0699037			66	-0.128928	0.137788	-0.94	0.349	-0.398996	0.14114
67	-0.184647	0.135624	-1.36	0.173	-0.450476	0.0811818			67	-0.194698	0.139475	-1.4	0.163	-0.468071	0.078676
68	-0.0265899	0.132281	-0.2	0.841	-0.285867	0.232687			68	-0.27688	0.14152	-1.96	0.05	-0.554263	0.0005043
69	-0.0961226	0.134256	-0.72	0.474	-0.35927	0.167025			69	-0.315474	0.142313	-2.22	0.027	-0.594411	-0.0365365
70	-0.136774	0.135892	-1.01	0.314	-0.403128	0.129579			70	-0.346957	0.143277	-2.42	0.015	-0.627784	-0.0661299
71	0.0169962	0.132916	0.13	0.898	-0.243526	0.277518			71	-0.280535	0.141932	-1.98	0.048	-0.558725	-0.0023457
72	-0.078801	0.136026	-0.58	0.562	-0.345419	0.187816			72	-0.343802	0.143814	-2.39	0.017	-0.625681	-0.061924
73	-0.0792097	0.137045	-0.58	0.563	-0.347824	0.189405			73	-0.305035	0.143295	-2.13	0.033	-0.585897	-0.0241726
74	-0.0328246	0.136572	-0.24	0.81	-0.300511	0.234862			74	-0.229198	0.141521	-1.62	0.105	-0.506583	0.0481878
75	0.0142239	0.136966	0.1	0.917	-0.254236	0.282684			75	-0.28888	0.144203	-2	0.045	-0.571521	-0.0062392
76	-0.0628953	0.140416	-0.45	0.654	-0.338116	0.212326			76	-0.33968	0.146993	-2.31	0.021	-0.62779	-0.0515697
77	0.044779	0.139527	0.32	0.748	-0.228699	0.318257			77	-0.303781	0.147078	-2.07	0.039	-0.592057	-0.0155048
78	0.0497883	0.142183	0.35	0.726	-0.228897	0.328474			78	-0.329917	0.150071	-2.2	0.028	-0.62406	-0.0357741
79	0.0707309	0.143921	0.49	0.623	-0.21136	0.352822			79	-0.406205	0.154899	-2.62	0.009	-0.709811	-0.1026
80	0.0748547	0.146952	0.51	0.61	-0.213176	0.362886			80	-0.397693	0.156902	-2.53	0.011	-0.705225	-0.0901614
81	0.0051953	0.152939	0.03	0.973	-0.294572	0.304962			81	-0.262769	0.154265	-1.7	0.089	-0.565131	0.0395939
82	0.381135	0.144016	2.65	0.008	0.0988585	0.663411			82	-0.188936	0.154512	-1.22	0.221	-0.491783	0.113911
83	0.240635	0.153315	1.57	0.117	-0.0598692	0.541138			83	-0.190405	0.158599	-1.2	0.23	-0.501263	0.120453
84	-0.0546098	0.172651	-0.32	0.752	-0.393012	0.283793			84	-0.507312	0.177606	-2.86	0.004	-0.855423	-0.1592
85	-0.0359091	0.182602	-0.2	0.844	-0.393817	0.321999			85	-0.111064	0.16611	-0.67	0.504	-0.436643	0.214515
86	0.268796	0.181096	1.48	0.138	-0.086159	0.623752			86	-0.192084	0.182082	-1.05	0.291	-0.54897	0.164801
87	0.202761	0.205546	0.99	0.324	-0.200118	0.605641			87	-0.295367	0.205677	-1.44	0.151	-0.6985	0.107766
88	0.0834509	0.244595	0.34	0.733	-0.395965	0.562867			88	-0.655156	0.261483	-2.51	0.012	-1.16767	-0.142643
89	0.0655332	0.281348	0.23	0.816	-0.48592	0.616987			89	-0.21184	0.246042	-0.86	0.389	-0.694089	0.27041
90	-0.556844	0.424221	-1.31	0.189	-1.38833	0.274647			90	-0.0859295	0.262545	-0.33	0.743	-0.600523	0.428664
91	0.144199	0.350463	0.41	0.681	-0.542724	0.831122			91	-0.677557	0.372444	-1.82	0.069	-1.40756	0.0524418
92	-1.11024	0.719986	-1.54	0.123	-2.52144	0.300966			92	-0.379304	0.352933	-1.07	0.283	-1.07106	0.312455
93	-0.0046264	0.462314	-0.01	0.992	-0.910782	0.901529			93	0.189061	0.301395	0.63	0.53	-0.40168	0.779802
94	-0.540677	0.717755	-0.75	0.451	-1.94751	0.866152			94	-0.284116	0.423052	-0.67	0.502	-1.11331	0.545076
95	0.233823	0.590551	0.4	0.692	-0.923682	1.39133			95	0.0973431	0.425175	0.23	0.819	-0.736011	0.930697
96	-0.433329	1.00731	-0.43	0.667	-2.40769	1.54104			96	-0.155783	0.588695	-0.26	0.791	-1.30964	0.998075
97	0.747654	0.734525	1.02	0.309	-0.692046	2.18735			97	0.376927	0.587971	0.64	0.521	-0.77551	1.52936
98	0.328945	0.996632	0.33	0.741	-1.6245	2.28239			98	-0.190103	1.01129	-0.19	0.851	-2.17226	1.79206
99	(empty)								99	(empty)
100	(empty)								100	0.801162	0.764881	1.05	0.295	-0.698024	2.30035
partner	-0.0245657	0.0445934	-0.55	0.582	-0.111971	0.0628393			partner	-0.176931	0.0449104	-3.94	0	-0.264957	-0.0889055
province_arrondis**									province_arrondis**
13	-0.0032437	0.11188	-0.03	0.977	-0.222533	0.216045			13	-0.102354	0.130737	-0.78	0.434	-0.358602	0.153895	715037
21	0.0791514	0.0863064	0.92	0.359	-0.0900127	0.248315			21	0.0367622	0.0869558	0.42	0.672	-0.133674	0.207198	715037
23	-0.162419	0.102696	-1.58	0.114	-0.363708	0.0388703			23	-0.163961	0.111081	-1.48	0.14	-0.381684	0.0537614	38742
24	-0.0374405	0.107184	-0.35	0.727	-0.247525	0.172644			24	-0.0947716	0.115207	-0.82	0.411	-0.320581	0.131038	7.59
25	-0.0004799	0.123744	0	0.997	-0.243023	0.242063			25	-0.0900306	0.131138	-0.69	0.492	-0.347065	0.167004	0
31	-0.0069774	0.0913012	-0.08	0.939	-0.185932	0.171977			31	-0.238981	0.105342	-2.27	0.023	-0.445454	-0.0325085
32	0.0146709	0.102456	0.14	0.886	-0.186148	0.21549			32	-0.267809	0.121961	-2.2	0.028	-0.506855	-0.0287624
41	0.0874502	0.0870276	1	0.315	-0.0831276	0.258028			41	0.0749823	0.0913683	0.82	0.412	-0.104102	0.254066
42	0.154949	0.0928986	1.67	0.095	-0.0271361	0.337034			42	0.0141482	0.104498	0.14	0.892	-0.19067	0.218966
51	0.134239	0.0875792	1.53	0.125	-0.0374201	0.305898			51	0.213197	0.0858252	2.48	0.013	0.0449777	0.381417
52	0.0399454	0.115134	0.35	0.729	-0.185722	0.265612			52	0.0922977	0.113825	0.81	0.417	-0.130802	0.315397
61	0.0763492	0.0827337	0.92	0.356	-0.0858124	0.238511			61	0.0731132	0.0834725	0.88	0.381	-0.090495	0.236721
71	0.118128	0.0855895	1.38	0.168	-0.0496307	0.285887			71	0.0908769	0.0949206	0.96	0.338	-0.0951699	0.276924
81	-0.347984	0.174754	-1.99	0.046	-0.690508	-0.0054589			81	0.0524964	0.152231	0.34	0.73	-0.245881	0.350874
91	0.168466	0.129496	1.3	0.193	-0.0853502	0.422283			91	0.0340154	0.133897	0.25	0.799	-0.228426	0.296456
92	0.199648	0.162126	1.23	0.218	-0.118125	0.517421			92	0.23041	0.157813	1.46	0.144	-0.0789076	0.539727
year									year
2005	-0.395776	0.0625527	-6.33	0	-0.518382	-0.27317			2005	-0.408342	0.0662614	-6.16	0	-0.538216	-0.278468
2006	-0.662926	0.0674825	-9.82	0	-0.795194	-0.530657			2006	-0.663223	0.0714917	-9.28	0	-0.803349	-0.523097
2007	-0.566579	0.065148	-8.7	0	-0.694272	-0.438886			2007	-0.596161	0.0695076	-8.58	0	-0.732397	-0.459924
2008	-0.64786	0.066315	-9.77	0	-0.77784	-0.51788			2008	-0.662791	0.0711704	-9.31	0	-0.802287	-0.523295
2009	-0.913488	0.0783497	-11.66	0	-1.06706	-0.759919			2009	-0.890089	0.0824378	-10.8	0	-1.05167	-0.728509
quarter									quarter
2	-0.103909	0.0546976	-1.9	0.057	-0.211119	0.0033002			2	-0.273802	0.0570747	-4.8	0	-0.38567	-0.161934
3	-0.344743	0.0581845	-5.92	0	-0.458787	-0.230699			3	-0.557952	0.0611649	-9.12	0	-0.677837	-0.438067
4	-0.186697	0.058919	-3.17	0.002	-0.30218	-0.0712129			4	-0.24553	0.0599557	-4.1	0	-0.363045	-0.128015
Preferential status initially	0.317043	0.0455333	6.96	0	0.227796	0.40629			Preferential status initially	0.176558	0.0448854	3.93	0	0.088581	0.264534
constant	-4.67193	0.134438	-34.75	0	-4.93544	-4.40843			constant	-4.58741	0.137593	-33.34	0	-4.8571	-4.31773
* Reference group: age = 65; no partner; province_part = 11; year = 2004; quarter = 1; no preferential status initially
** See sheet "codes-province"

## Sheet: deme
Dependent variable: dementia									Dependent variable: dementia
	Sex = M									Sex = F
Number	of	strata	=	40	Number of obs	=	530895		Number	of	strata	=	40	Number of obs	=	696060
Number	of	PSUs	=	30612	Population size	=	530895		Number	of	PSUs	=	38676	Population size	=	696060
					Design df	=	30572							Design df	=	38636
					F( 60, 30513)	=	9.76							F( 61, 38576)	=	14.45
					Prob > F	=	0							Prob > F	=	0
deme	Coef.	Std. Err.	t	P>t	[95% Conf.	Interval]			deme	Coef.	Std. Err.	t	P>t	[95% Conf.	Interval]
age									age
66	-0.870445	0.283874	-3.07	0.002	-1.42685	-0.314041			66	-0.406671	0.21202	-1.92	0.055	-0.822235	0.0088937
67	-0.203111	0.244526	-0.83	0.406	-0.682392	0.276169			67	-0.017481	0.19669	-0.09	0.929	-0.402998	0.368036
68	-0.178917	0.24356	-0.73	0.463	-0.656305	0.29847			68	0.0443956	0.194254	0.23	0.819	-0.336348	0.425139
69	-0.259728	0.24656	-1.05	0.292	-0.742996	0.223541			69	-0.127815	0.199514	-0.64	0.522	-0.518868	0.263237
70	0.167145	0.23039	0.73	0.468	-0.284429	0.618719			70	0.0340338	0.194262	0.18	0.861	-0.346724	0.414791
71	0.128337	0.233157	0.55	0.582	-0.328661	0.585334			71	0.0201781	0.195436	0.1	0.918	-0.362882	0.403238
72	0.222452	0.231449	0.96	0.336	-0.231197	0.676102			72	-0.0469177	0.198018	-0.24	0.813	-0.435039	0.341204
73	-0.0219256	0.242876	-0.09	0.928	-0.497974	0.454122			73	0.0517157	0.195363	0.26	0.791	-0.331201	0.434632
74	0.355088	0.229228	1.55	0.121	-0.0942081	0.804383			74	0.376284	0.18668	2.02	0.044	0.010386	0.742182
75	0.302601	0.232453	1.3	0.193	-0.153017	0.758219			75	0.354919	0.188124	1.89	0.059	-0.0138087	0.723647
76	0.265026	0.235831	1.12	0.261	-0.197213	0.727264			76	0.496422	0.185597	2.67	0.007	0.132647	0.860197
77	0.521135	0.229266	2.27	0.023	0.0717641	0.970507			77	0.665846	0.183193	3.63	0	0.306783	1.02491
78	0.699358	0.226619	3.09	0.002	0.255176	1.14354			78	0.62843	0.185906	3.38	0.001	0.26405	0.99281
79	0.682677	0.22987	2.97	0.003	0.232123	1.13323			79	0.881639	0.181699	4.85	0	0.525505	1.23777
80	0.854498	0.227255	3.76	0	0.409069	1.29993			80	0.924081	0.182088	5.07	0	0.567184	1.28098
81	1.26747	0.218917	5.79	0	0.838389	1.69656			81	0.962458	0.182748	5.27	0	0.604268	1.32065
82	1.15874	0.225037	5.15	0	0.717657	1.59982			82	0.887898	0.186605	4.76	0	0.522147	1.25365
83	1.16304	0.228891	5.08	0	0.714403	1.61168			83	0.908352	0.188273	4.82	0	0.539332	1.27737
84	1.16386	0.232744	5	0	0.707677	1.62005			84	1.16682	0.18474	6.32	0	0.804724	1.52891
85	1.15107	0.240595	4.78	0	0.679491	1.62264			85	1.29706	0.185657	6.99	0	0.933165	1.66095
86	1.55202	0.233386	6.65	0	1.09457	2.00947			86	1.32384	0.190301	6.96	0	0.950847	1.69684
87	1.37922	0.255799	5.39	0	0.87784	1.88059			87	1.38393	0.196992	7.03	0	0.997817	1.77004
88	1.21406	0.288863	4.2	0	0.647872	1.78024			88	1.49294	0.203577	7.33	0	1.09393	1.89196
89	1.36731	0.306319	4.46	0	0.766911	1.96771			89	1.52211	0.21542	7.07	0	1.09988	1.94434
90	1.53007	0.324482	4.72	0	0.894068	2.16606			90	1.60164	0.227598	7.04	0	1.15555	2.04774
91	1.18016	0.40495	2.91	0.004	0.386442	1.97388			91	1.44058	0.252393	5.71	0	0.945879	1.93527
92	1.12866	0.45414	2.49	0.013	0.238522	2.01879			92	1.46017	0.264854	5.51	0	0.941051	1.97929
93	1.34215	0.456779	2.94	0.003	0.446845	2.23746			93	1.401	0.288311	4.86	0	0.835905	1.9661
94	1.00557	0.614523	1.64	0.102	-0.198921	2.21006			94	1.09723	0.355264	3.09	0.002	0.4009	1.79355
95	2.19077	0.435944	5.03	0	1.3363	3.04524			95	1.81969	0.316599	5.75	0	1.19915	2.44024
96	2.31878	0.489655	4.74	0	1.35904	3.27853			96	1.70011	0.395469	4.3	0	0.92498	2.47524
97	1.88102	0.719333	2.61	0.009	0.471098	3.29094			97	1.74448	0.479817	3.64	0	0.804025	2.68493
98	2.30645	0.77807	2.96	0.003	0.781399	3.8315			98	1.81429	0.59438	3.05	0.002	0.649293	2.97929
99	1.97756	1.03408	1.91	0.056	-0.0492788	4.0044			99	2.60941	0.543035	4.81	0	1.54505	3.67377
100	(empty)								100	0.971202	1.0388	0.93	0.35	-1.06488	3.00728
partner	-0.117679	0.0594347	-1.98	0.048	-0.234173	-0.001184			partner	-0.0715443	0.0458783	-1.56	0.119	-0.161467	0.0183782
province_arrondis**									province_arrondis**
13	0.327252	0.155438	2.11	0.035	0.0225873	0.631918			13	0.212724	0.127436	1.67	0.095	-0.0370533	0.462502
21	0.365359	0.120952	3.02	0.003	0.128288	0.60243			21	0.0490528	0.0899241	0.55	0.585	-0.127201	0.225306
23	0.241626	0.13792	1.75	0.08	-0.0287022	0.511954			23	0.285948	0.102422	2.79	0.005	0.0851986	0.486698
24	0.194852	0.153027	1.27	0.203	-0.105087	0.494791			24	0.150441	0.112982	1.33	0.183	-0.0710078	0.371889
25	0.3103	0.167807	1.85	0.064	-0.018609	0.639209			25	0.351544	0.116444	3.02	0.003	0.12331	0.579777
31	0.0958708	0.136854	0.7	0.484	-0.172369	0.364111			31	0.147179	0.10051	1.46	0.143	-0.0498222	0.344181
32	0.428129	0.140057	3.06	0.002	0.153612	0.702647			32	0.329205	0.106626	3.09	0.002	0.120216	0.538196
41	0.299486	0.126895	2.36	0.018	0.0507677	0.548205			41	0.152186	0.0953993	1.6	0.111	-0.0347993	0.339171
42	0.3793	0.134765	2.81	0.005	0.115155	0.643445			42	0.0987797	0.109141	0.91	0.365	-0.115139	0.312698
51	0.253819	0.128949	1.97	0.049	0.0010731	0.506564			51	0.263583	0.0890213	2.96	0.003	0.0890987	0.438067
52	0.158153	0.167887	0.94	0.346	-0.170913	0.487219			52	0.184793	0.116783	1.58	0.114	-0.0441051	0.413692
61	0.493182	0.113772	4.33	0	0.270184	0.716179			61	0.393963	0.0819277	4.81	0	0.233383	0.554543
71	0.217291	0.131003	1.66	0.097	-0.0394806	0.474062			71	0.271329	0.0994654	2.73	0.006	0.0763741	0.466284
81	0.665535	0.17837	3.73	0	0.315921	1.01515			81	0.0856859	0.160683	0.53	0.594	-0.229256	0.400628
91	0.49557	0.174519	2.84	0.005	0.153505	0.837635			91	0.386199	0.123743	3.12	0.002	0.143659	0.628738
92	0.331523	0.233926	1.42	0.156	-0.12698	0.790027			92	0.291193	0.164276	1.77	0.076	-0.0307919	0.613178
year									year
2005	0.0224914	0.107036	0.21	0.834	-0.187304	0.232287			2005	-0.190498	0.0744906	-2.56	0.011	-0.336501	-0.0444941
2006	0.126032	0.103406	1.22	0.223	-0.0766474	0.328712			2006	-0.0646354	0.0719268	-0.9	0.369	-0.205614	0.0763429
2007	0.0488112	0.104307	0.47	0.64	-0.155634	0.253257			2007	-0.168217	0.0724955	-2.32	0.02	-0.31031	-0.0261243
2008	0.138066	0.101603	1.36	0.174	-0.0610791	0.337212			2008	-0.135441	0.0710264	-1.91	0.057	-0.274655	0.0037722
2009	-0.020632	0.111109	-0.19	0.853	-0.238411	0.197147			2009	-0.295195	0.0801241	-3.68	0	-0.452241	-0.13815
quarter									quarter
2	-0.0798774	0.0751869	-1.06	0.288	-0.227247	0.067492			2	-0.0069282	0.057276	-0.12	0.904	-0.119191	0.105334
3	-0.142928	0.0759689	-1.88	0.06	-0.291831	0.0059738			3	-0.124781	0.0587282	-2.12	0.034	-0.23989	-0.0096719
4	-0.0820754	0.0804113	-1.02	0.307	-0.239685	0.075534			4	0.0916843	0.0591882	1.55	0.121	-0.0243261	0.207695
Preferential status initially	0.0744707	0.0643418	1.16	0.247	-0.0516419	0.200583			Preferential status initially	0.0493972	0.0437779	1.13	0.259	-0.0364087	0.135203
constant	-6.61546	0.236026	-28.03	0	-7.07808	-6.15284			constant	-6.20803	0.182862	-33.95	0	-6.56644	-5.84962
* Reference group: age = 65; no partner; province_part = 11; year = 2004; quarter = 1; no preferential status initially
** See sheet "codes-province"

## Sheet: diab
Dependent variable: diabetes									Dependent variable: diabetes
	Sex = M									Sex = F
Number	of	strata	=	36	Number of obs	=	522069		Number	of	strata	=	38	Number of obs	=	697190
Number	of	PSUs	=	30585	Population size	=	522069		Number	of	PSUs	=	38659	Population size	=	697190
					Design df	=	30549							Design df	=	38621
					F( 55, 30495)	=	4.19							F( 57, 38565)	=	4.58
					Prob > F	=	0							Prob > F	=	0
diab	Coef.	Std. Err.	t	P>t	[95% Conf.	Interval]			diab	Coef.	Std. Err.	t	P>t	[95% Conf.	Interval]
age									age
66	-0.511139	0.131063	-3.9	0	-0.768028	-0.254249			66	-0.471	0.144273	-3.26	0.001	-0.753779	-0.188221
67	-0.534967	0.132288	-4.04	0	-0.794256	-0.275678			67	-0.563505	0.147584	-3.82	0	-0.852774	-0.274236
68	-0.634255	0.135554	-4.68	0	-0.899947	-0.368562			68	-0.42053	0.142409	-2.95	0.003	-0.699656	-0.141404
69	-0.500462	0.131482	-3.81	0	-0.758172	-0.242752			69	-0.401122	0.141638	-2.83	0.005	-0.678736	-0.123508
70	-0.499524	0.132332	-3.77	0	-0.758901	-0.240148			70	-0.531001	0.145554	-3.65	0	-0.81629	-0.245713
71	-0.582234	0.135975	-4.28	0	-0.84875	-0.315717			71	-0.462335	0.144116	-3.21	0.001	-0.744806	-0.179864
72	-0.591417	0.137781	-4.29	0	-0.861473	-0.321361			72	-0.552272	0.147438	-3.75	0	-0.841253	-0.26329
73	-0.767836	0.145613	-5.27	0	-1.05324	-0.482428			73	-0.354964	0.14187	-2.5	0.012	-0.633032	-0.076896
74	-0.717752	0.144567	-4.96	0	-1.00111	-0.434394			74	-0.291685	0.140346	-2.08	0.038	-0.566767	-0.0166023
75	-0.514356	0.138773	-3.71	0	-0.786358	-0.242354			75	-0.468342	0.146808	-3.19	0.001	-0.756088	-0.180595
76	-0.901485	0.156643	-5.76	0	-1.20851	-0.594459			76	-0.491922	0.149196	-3.3	0.001	-0.78435	-0.199495
77	-0.879046	0.1593	-5.52	0	-1.19128	-0.566811			77	-0.490772	0.150626	-3.26	0.001	-0.786003	-0.195542
78	-0.592076	0.149813	-3.95	0	-0.885717	-0.298436			78	-0.951464	0.173564	-5.48	0	-1.29165	-0.611273
79	-0.680451	0.157695	-4.31	0	-0.98954	-0.371363			79	-0.348044	0.149832	-2.32	0.02	-0.641717	-0.05437
80	-0.7578	0.166495	-4.55	0	-1.08414	-0.431463			80	-0.601168	0.162678	-3.7	0	-0.920022	-0.282315
81	-0.934648	0.182612	-5.12	0	-1.29258	-0.576721			81	-0.488316	0.161164	-3.03	0.002	-0.804202	-0.172429
82	-0.876247	0.186143	-4.71	0	-1.2411	-0.511398			82	-0.500675	0.165536	-3.02	0.002	-0.825129	-0.17622
83	-0.642519	0.178474	-3.6	0	-0.992335	-0.292703			83	-1.08854	0.205895	-5.29	0	-1.49209	-0.684975
84	-1.18248	0.230763	-5.12	0	-1.63478	-0.730176			84	-1.12347	0.216014	-5.2	0	-1.54686	-0.700076
85	-0.60516	0.198008	-3.06	0.002	-0.993264	-0.217056			85	-0.530999	0.185325	-2.87	0.004	-0.894241	-0.167757
86	-1.49692	0.317991	-4.71	0	-2.1202	-0.873647			86	-0.788763	0.220072	-3.58	0	-1.22011	-0.357416
87	-0.703407	0.256519	-2.74	0.006	-1.20619	-0.200618			87	-0.831414	0.244838	-3.4	0.001	-1.3113	-0.351526
88	-1.31466	0.39183	-3.36	0.001	-2.08267	-0.546661			88	-1.02786	0.299333	-3.43	0.001	-1.61456	-0.44116
89	-1.51768	0.51081	-2.97	0.003	-2.5189	-0.516476			89	-1.08297	0.351976	-3.08	0.002	-1.77285	-0.393088
90	-1.49376	0.588078	-2.54	0.011	-2.64642	-0.341104			90	-0.786038	0.351413	-2.24	0.025	-1.47482	-0.0972603
91	-1.22837	0.586089	-2.1	0.036	-2.37713	-0.0796153			91	-2.76045	1.00591	-2.74	0.006	-4.73207	-0.788836
92	-2.09329	1.00762	-2.08	0.038	-4.06826	-0.118309			92	-0.789499	0.424157	-1.86	0.063	-1.62086	0.0418595
93	(empty)								93	-1.30208	0.589535	-2.21	0.027	-2.45758	-0.146576
94	-1.52828	1.0096	-1.51	0.13	-3.50714	0.45058			94	-2.10722	1.00657	-2.09	0.036	-4.08012	-0.134319
95	-1.17037	1.0066	-1.16	0.245	-3.14335	0.802597			95	-1.03645	0.718192	-1.44	0.149	-2.44413	0.37122
96	(empty)								96	(empty)
97	(empty)								97	-0.061119	0.717994	-0.09	0.932	-1.4684	1.34617
98	(empty)								98	(empty)
99	(empty)								99	(empty)
100	(empty)								100	(empty)
partner	-0.0621866	0.0557989	-1.11	0.265	-0.171555	0.0471816			partner	-0.0233226	0.0495838	-0.47	0.638	-0.120508	0.073863
province_arrondis**									province_arrondis**
13	0.194211	0.139494	1.39	0.164	-0.0792041	0.467625			13	0.010342	0.140816	0.07	0.941	-0.26566	0.286344
21	0.477711	0.106265	4.5	0	0.269426	0.685995			21	0.0365832	0.100953	0.36	0.717	-0.161286	0.234453
23	0.153473	0.124653	1.23	0.218	-0.0908527	0.397798			23	-0.0390677	0.120504	-0.32	0.746	-0.275258	0.197123
24	0.12153	0.136957	0.89	0.375	-0.146912	0.389972			24	0.0875331	0.122223	0.72	0.474	-0.152028	0.327094
25	0.303912	0.150815	2.02	0.044	0.0083076	0.599517			25	0.0730024	0.140818	0.52	0.604	-0.203004	0.349009
31	0.128239	0.118195	1.08	0.278	-0.103429	0.359907			31	-0.130561	0.115194	-1.13	0.257	-0.356344	0.0952228
32	0.451542	0.120081	3.76	0	0.216178	0.686906			32	0.160485	0.118234	1.36	0.175	-0.0712569	0.392227
41	0.314342	0.110415	2.85	0.004	0.0979239	0.530761			41	0.0170687	0.105759	0.16	0.872	-0.190222	0.22436
42	0.100065	0.127202	0.79	0.431	-0.149256	0.349386			42	0.0003406	0.117802	0	0.998	-0.230555	0.231236
51	0.520979	0.106635	4.89	0	0.311969	0.729988			51	0.105559	0.101462	1.04	0.298	-0.0933101	0.304427
52	0.393162	0.13629	2.88	0.004	0.126028	0.660295			52	0.093768	0.1312	0.71	0.475	-0.163388	0.350924
61	0.299897	0.105779	2.84	0.005	0.0925658	0.507227			61	0.325551	0.0903787	3.6	0	0.148406	0.502695
71	0.0581491	0.117223	0.5	0.62	-0.171613	0.287911			71	-0.0114913	0.110779	-0.1	0.917	-0.228622	0.205639
81	0.352359	0.17882	1.97	0.049	0.0018648	0.702854			81	0.038801	0.174616	0.22	0.824	-0.303451	0.381053
91	0.410978	0.159757	2.57	0.01	0.0978469	0.724109			91	-0.0183957	0.15863	-0.12	0.908	-0.329315	0.292523
92	0.166467	0.221469	0.75	0.452	-0.267621	0.600556			92	-0.118061	0.20686	-0.57	0.568	-0.523512	0.28739
year									year
2005	-0.265818	0.0830915	-3.2	0.001	-0.42868	-0.102955			2005	-0.401651	0.0782967	-5.13	0	-0.555114	-0.248187
2006	-0.314731	0.0845234	-3.72	0	-0.4804	-0.149061			2006	-0.550387	0.0810311	-6.79	0	-0.70921	-0.391564
2007	-0.229981	0.0826219	-2.78	0.005	-0.391923	-0.0680388			2007	-0.290853	0.0759064	-3.83	0	-0.439631	-0.142074
2008	-0.152047	0.0810439	-1.88	0.061	-0.310896	0.006803			2008	-0.318362	0.0760069	-4.19	0	-0.467338	-0.169387
2009	-0.617149	0.0983998	-6.27	0	-0.810016	-0.424281			2009	-0.715363	0.0921971	-7.76	0	-0.896072	-0.534654
quarter									quarter
2	0.0231112	0.0667863	0.35	0.729	-0.107793	0.154015			2	0.0940864	0.064578	1.46	0.145	-0.0324881	0.220661
3	-0.212488	0.0703059	-3.02	0.003	-0.35029	-0.0746855			3	-0.221407	0.0693264	-3.19	0.001	-0.357289	-0.0855256
4	-0.120477	0.0725449	-1.66	0.097	-0.262668	0.0217144			4	-0.0452053	0.0700316	-0.65	0.519	-0.182469	0.0920583
Preferential status initially	0.237315	0.058649	4.05	0	0.12236	0.352269			Preferential status initially	0.237167	0.0510517	4.65	0	0.137104	0.33723
constant	-4.9728	0.142307	-34.94	0	-5.25173	-4.69387			constant	-5.08828	0.141909	-35.86	0	-5.36643	-4.81014
* Reference group: age = 65; no partner; province_part = 11; year = 2004; quarter = 1; no preferential status initially
** See sheet "codes-province"

## Sheet: hipf
Dependent variable: hip fracture									Dependent variable: hip fracture
	Sex = M									Sex = F
Number	of	strata	=	38	Number of obs	=	534797		Number	of	strata	=	40	Number of obs	=	699608
Number	of	PSUs	=	30605	Population size	=	534797		Number	of	PSUs	=	38676	Population size	=	699608
					Design df	=	30567							Design df	=	38636
					F( 58, 30510)	=	3.45							F( 61, 38576)	=	11.62
					Prob > F	=	0							Prob > F	=	0
hipf	Coef.	Std. Err.	t	P>t	[95% Conf.	Interval]			hipf	Coef.	Std. Err.	t	P>t	[95% Conf.	Interval]
age									age
66	0.299506	0.352474	0.85	0.395	-0.391358	0.99037			66	0.310737	0.301904	1.03	0.303	-0.281002	0.902477
67	0.410835	0.348193	1.18	0.238	-0.271637	1.09331			67	0.426552	0.297387	1.43	0.151	-0.156334	1.00944
68	-0.0447716	0.372264	-0.12	0.904	-0.774424	0.684881			68	0.848273	0.284176	2.99	0.003	0.29128	1.40527
69	0.626747	0.339446	1.85	0.065	-0.038582	1.29208			69	0.697162	0.287719	2.42	0.015	0.133226	1.2611
70	0.403572	0.349264	1.16	0.248	-0.281	1.08814			70	0.700813	0.287743	2.44	0.015	0.136829	1.2648
71	0.531055	0.34558	1.54	0.124	-0.146296	1.20841			71	0.928218	0.282611	3.28	0.001	0.374293	1.48214
72	0.68308	0.341184	2	0.045	0.0143458	1.35181			72	1.05319	0.280057	3.76	0	0.504267	1.6021
73	0.719283	0.341327	2.11	0.035	0.0502682	1.3883			73	1.1402	0.278911	4.09	0	0.593533	1.68688
74	0.896174	0.336285	2.66	0.008	0.237041	1.55531			74	1.15834	0.27883	4.15	0	0.611823	1.70485
75	0.915654	0.337025	2.72	0.007	0.255071	1.57624			75	1.22199	0.278304	4.39	0	0.676502	1.76747
76	1.13515	0.331998	3.42	0.001	0.484415	1.78588			76	1.51836	0.273833	5.54	0	0.981641	2.05508
77	0.990031	0.338768	2.92	0.003	0.326032	1.65403			77	1.36499	0.277269	4.92	0	0.821532	1.90844
78	1.21656	0.334263	3.64	0	0.56139	1.87173			78	1.45302	0.277037	5.24	0	0.910019	1.99602
79	1.09703	0.341405	3.21	0.001	0.427863	1.7662			79	1.29453	0.281508	4.6	0	0.742764	1.84629
80	1.02623	0.348119	2.95	0.003	0.343899	1.70856			80	1.5092	0.278761	5.41	0	0.962823	2.05558
81	1.20926	0.344475	3.51	0	0.534079	1.88445			81	1.4718	0.280327	5.25	0	0.922352	2.02125
82	1.34907	0.343533	3.93	0	0.675727	2.02241			82	1.72026	0.277258	6.2	0	1.17683	2.26369
83	1.07767	0.362296	2.97	0.003	0.367553	1.78778			83	1.78546	0.278116	6.42	0	1.24034	2.33057
84	1.39333	0.352275	3.96	0	0.702853	2.0838			84	1.93307	0.277442	6.97	0	1.38927	2.47686
85	1.3047	0.366564	3.56	0	0.586221	2.02318			85	2.08694	0.27735	7.52	0	1.54333	2.63055
86	1.60847	0.361364	4.45	0	0.900182	2.31676			86	2.03816	0.282927	7.2	0	1.48362	2.5927
87	1.46339	0.391581	3.74	0	0.695875	2.23091			87	2.21788	0.285137	7.78	0	1.65901	2.77676
88	0.982689	0.483847	2.03	0.042	0.0343288	1.93105			88	2.02513	0.300803	6.73	0	1.43554	2.61471
89	1.61695	0.450095	3.59	0	0.73474	2.49915			89	2.26695	0.30363	7.47	0	1.67183	2.86208
90	2.29023	0.418966	5.47	0	1.46904	3.11142			90	2.11142	0.325883	6.48	0	1.47268	2.75016
91	1.88751	0.508368	3.71	0	0.891089	2.88393			91	2.04155	0.346934	5.88	0	1.36155	2.72155
92	1.72039	0.58846	2.92	0.003	0.566983	2.8738			92	2.46275	0.331574	7.43	0	1.81285	3.11264
93	1.89949	0.583762	3.25	0.001	0.755298	3.04369			93	2.41402	0.347066	6.96	0	1.73376	3.09428
94	1.99965	0.650025	3.08	0.002	0.725571	3.27372			94	2.82981	0.342244	8.27	0	2.15901	3.50062
95	1.21975	1.05633	1.15	0.248	-0.850703	3.2902			95	2.4701	0.411961	6	0	1.66264	3.27755
96	1.69996	1.04558	1.63	0.104	-0.349409	3.74933			96	2.9932	0.403433	7.42	0	2.20246	3.78394
97	2.8804	0.79109	3.64	0	1.32983	4.43097			97	2.49311	0.570434	4.37	0	1.37505	3.61117
98	(empty)								98	1.63467	1.03774	1.58	0.115	-0.399337	3.66868
99	(empty)								99	2.83352	0.773631	3.66	0	1.31718	4.34985
100	(empty)								100	1.95342	1.02578	1.9	0.057	-0.0571421	3.96398
partner	0.056359	0.0802308	0.7	0.482	-0.100897	0.213615			partner	-0.07273	0.0497522	-1.46	0.144	-0.170246	0.0247856
province_arrondis**									province_arrondis**
13	0.0683576	0.190242	0.36	0.719	-0.304524	0.44124			13	0.0193445	0.14149	0.14	0.891	-0.257979	0.296668
21	-0.134595	0.157008	-0.86	0.391	-0.442337	0.173147			21	-0.0160169	0.0947479	-0.17	0.866	-0.201725	0.169691
23	-0.167771	0.176772	-0.95	0.343	-0.514252	0.17871			23	0.206298	0.108027	1.91	0.056	-0.0054382	0.418035
24	-0.264127	0.201974	-1.31	0.191	-0.660005	0.131751			24	-0.132629	0.129354	-1.03	0.305	-0.386167	0.120908
25	0.185212	0.196716	0.94	0.346	-0.200359	0.570783			25	0.282259	0.123592	2.28	0.022	0.0400155	0.524501
31	0.0139452	0.15791	0.09	0.93	-0.295566	0.323456			31	0.0150354	0.107869	0.14	0.889	-0.196391	0.226462
32	0.143378	0.172451	0.83	0.406	-0.194633	0.481388			32	0.199977	0.116619	1.71	0.086	-0.0285983	0.428553
41	-0.0533106	0.157378	-0.34	0.735	-0.361778	0.255157			41	-0.0927721	0.106073	-0.87	0.382	-0.300677	0.115133
42	0.0692243	0.166415	0.42	0.677	-0.256956	0.395405			42	-0.0772773	0.120194	-0.64	0.52	-0.312861	0.158306
51	-0.0057784	0.157643	-0.04	0.971	-0.314766	0.303209			51	0.0131415	0.0991138	0.13	0.895	-0.181124	0.207407
52	0.128271	0.192628	0.67	0.505	-0.249288	0.50583			52	0.259528	0.118315	2.19	0.028	0.0276275	0.491428
61	0.0236047	0.144031	0.16	0.87	-0.258701	0.305911			61	0.228356	0.0876333	2.61	0.009	0.0565926	0.40012
71	-0.169546	0.164529	-1.03	0.303	-0.49203	0.152938			71	0.029482	0.11098	0.27	0.791	-0.188042	0.247006
81	-0.0507509	0.266211	-0.19	0.849	-0.572535	0.471033			81	0.173644	0.158894	1.09	0.274	-0.137792	0.485081
91	0.0552159	0.232891	0.24	0.813	-0.401261	0.511693			91	0.226901	0.135037	1.68	0.093	-0.0377752	0.491578
92	-0.21123	0.32901	-0.64	0.521	-0.856102	0.433643			92	0.361718	0.164157	2.2	0.028	0.0399656	0.68347
year									year
2005	0.13861	0.144687	0.96	0.338	-0.144983	0.422202			2005	-0.0036816	0.0823186	-0.04	0.964	-0.165028	0.157665
2006	0.212175	0.140927	1.51	0.132	-0.0640478	0.488398			2006	-0.0850989	0.0826185	-1.03	0.303	-0.247033	0.0768355
2007	0.409853	0.136947	2.99	0.003	0.141431	0.678276			2007	-0.0753995	0.081718	-0.92	0.356	-0.235569	0.0847699
2008	0.287531	0.138286	2.08	0.038	0.0164858	0.558577			2008	-0.0867083	0.0813856	-1.07	0.287	-0.246226	0.0728095
2009	0.245101	0.149236	1.64	0.101	-0.0474072	0.53761			2009	-0.0929103	0.0890578	-1.04	0.297	-0.267466	0.0816452
quarter									quarter
2	-0.153619	0.101286	-1.52	0.129	-0.352144	0.0449051			2	-0.0869784	0.0617018	-1.41	0.159	-0.207916	0.0339587
3	-0.022329	0.0982015	-0.23	0.82	-0.214808	0.17015			3	-0.18279	0.0632809	-2.89	0.004	-0.306822	-0.0587576
4	0.117213	0.102407	1.14	0.252	-0.0835099	0.317935			4	0.0156002	0.065338	0.24	0.811	-0.112464	0.143664
Preferential status initially	-0.0232643	0.0880422	-0.26	0.792	-0.195831	0.149302			Preferential status initially	-0.0167306	0.0486461	-0.34	0.731	-0.112078	0.0786171
constant	-7.57308	0.345458	-21.92	0	-8.25019	-6.89597			constant	-7.0468	0.275713	-25.56	0	-7.58721	-6.5064
* Reference group: age = 65; no partner; province_part = 11; year = 2004; quarter = 1; no preferential status initially
** See sheet "codes-province"

## Sheet: park
Dependent variable: parkinson's disease									Dependent variable: parkinson's disease
	Sex = M									Sex = F
Number	of	strata	=	37	Number of obs	=	535291		Number	of	strata	=	38	Number of obs	=	711427
Number	of	PSUs	=	30598	Population size	=	535291		Number	of	PSUs	=	38659	Population size	=	711427
					Design df	=	30561							Design df	=	38621
					F( 55, 30507)	=	3.53							F( 57, 38565)	=	3.83
					Prob > F	=	0							Prob > F	=	0
park	Coef.	Std. Err.	t	P>t	[95% Conf.	Interval]			park	Coef.	Std. Err.	t	P>t	[95% Conf.	Interval]
age									age
66	1.48669	1.05402	1.41	0.158	-0.579232	3.5526			66	0.176458	0.421509	0.42	0.675	-0.64971	1.00263
67	2.13378	1.0291	2.07	0.038	0.1167	4.15087			67	0.0076468	0.433341	0.02	0.986	-0.841713	0.857007
68	1.93782	1.03551	1.87	0.061	-0.0918275	3.96747			68	0.110088	0.424471	0.26	0.795	-0.721887	0.942062
69	1.87707	1.03781	1.81	0.071	-0.157071	3.91121			69	0.144567	0.421442	0.34	0.732	-0.68147	0.970604
70	2.47458	1.0217	2.42	0.015	0.472002	4.47716			70	0.37688	0.408011	0.92	0.356	-0.422832	1.17659
71	2.63153	1.01944	2.58	0.01	0.633391	4.62968			71	0.11242	0.424456	0.26	0.791	-0.719525	0.944365
72	2.40745	1.02492	2.35	0.019	0.398576	4.41633			72	0.633487	0.397932	1.59	0.111	-0.14647	1.41345
73	2.33134	1.02762	2.27	0.023	0.317169	4.34551			73	0.472772	0.406286	1.16	0.245	-0.323558	1.2691
74	3.00163	1.01486	2.96	0.003	1.01247	4.9908			74	0.63681	0.398934	1.6	0.11	-0.145112	1.41873
75	3.06941	1.01454	3.03	0.002	1.08087	5.05795			75	1.12926	0.383152	2.95	0.003	0.378271	1.88025
76	2.74736	1.02096	2.69	0.007	0.746225	4.74849			76	1.10116	0.385574	2.86	0.004	0.345429	1.8569
77	3.10471	1.01579	3.06	0.002	1.11372	5.0957			77	0.784774	0.398231	1.97	0.049	0.0042308	1.56532
78	3.06751	1.01791	3.01	0.003	1.07237	5.06265			78	1.00753	0.391389	2.57	0.01	0.2404	1.77466
79	3.35213	1.01491	3.3	0.001	1.36287	5.34139			79	1.32293	0.383792	3.45	0.001	0.570689	2.07517
80	3.3219	1.01675	3.27	0.001	1.32902	5.31478			80	0.804917	0.405774	1.98	0.047	0.0095897	1.60024
81	3.4604	1.01611	3.41	0.001	1.46878	5.45201			81	1.15189	0.393977	2.92	0.003	0.379689	1.9241
82	3.60331	1.01568	3.55	0	1.61255	5.59408			82	0.947477	0.405814	2.33	0.02	0.152072	1.74288
83	3.29886	1.02386	3.22	0.001	1.29205	5.30567			83	1.11743	0.402897	2.77	0.006	0.327746	1.90712
84	3.4777	1.02249	3.4	0.001	1.47357	5.48183			84	1.47363	0.392701	3.75	0	0.703928	2.24334
85	3.26687	1.03346	3.16	0.002	1.24126	5.29249			85	0.841974	0.433439	1.94	0.052	-0.0075777	1.69153
86	3.43708	1.03618	3.32	0.001	1.40612	5.46804			86	0.9744	0.438836	2.22	0.026	0.114271	1.83453
87	3.50555	1.04553	3.35	0.001	1.45627	5.55483			87	1.64119	0.409844	4	0	0.83789	2.4445
88	3.06537	1.09577	2.8	0.005	0.917623	5.21312			88	1.68267	0.427165	3.94	0	0.845415	2.51992
89	2.51478	1.22559	2.05	0.04	0.112576	4.91698			89	0.205921	0.67805	0.3	0.761	-1.12307	1.53492
90	2.86294	1.22424	2.34	0.019	0.463383	5.26249			90	0.82587	0.614142	1.34	0.179	-0.377865	2.02961
91	3.14009	1.22586	2.56	0.01	0.737346	5.54282			91	0.385451	0.795437	0.48	0.628	-1.17362	1.94453
92	(empty)								92	2.06976	0.48714	4.25	0	1.11495	3.02456
93	3.58758	1.22904	2.92	0.004	1.17861	5.99654			93	0.724325	0.792859	0.91	0.361	-0.829698	2.27835
94	4.36899	1.15583	3.78	0	2.10351	6.63448			94	1.00315	0.792581	1.27	0.206	-0.550326	2.55663
95	(empty)								95	(empty)
96	4.12177	1.41034	2.92	0.003	1.35745	6.8861			96	1.10462	1.06604	1.04	0.3	-0.984837	3.19407
97	(empty)								97	1.61885	1.06506	1.52	0.129	-0.468689	3.70639
98	(empty)								98	(empty)
99	(empty)								99	(empty)
100	(empty)								100	(empty)
partner	0.124482	0.101399	1.23	0.22	-0.074264	0.323229			partner	0.0578194	0.0866523	0.67	0.505	-0.112021	0.22766
province_arrondis**									province_arrondis**
13	-0.263325	0.285255	-0.92	0.356	-0.822436	0.295786			13	-0.131856	0.267414	-0.49	0.622	-0.655994	0.392281
21	-0.0762028	0.204939	-0.37	0.71	-0.477892	0.325487			21	0.0409489	0.171192	0.24	0.811	-0.294592	0.37649
23	-0.0391485	0.221412	-0.18	0.86	-0.473125	0.394828			23	-0.266132	0.229186	-1.16	0.246	-0.715342	0.183077
24	0.0035592	0.240811	0.01	0.988	-0.46844	0.475559			24	0.0479983	0.217274	0.22	0.825	-0.377865	0.473861
25	0.435113	0.237709	1.83	0.067	-0.0308067	0.901032			25	0.254754	0.226158	1.13	0.26	-0.18852	0.698029
31	0.158973	0.197733	0.8	0.421	-0.228592	0.546538			31	-0.01077	0.195418	-0.06	0.956	-0.393794	0.372254
32	0.0908961	0.229197	0.4	0.692	-0.35834	0.540133			32	-0.208423	0.240571	-0.87	0.386	-0.679948	0.263102
41	0.19595	0.192043	1.02	0.308	-0.180462	0.572363			41	0.441361	0.163927	2.69	0.007	0.12006	0.762662
42	-0.38771	0.259204	-1.5	0.135	-0.895761	0.12034			42	0.171953	0.196548	0.87	0.382	-0.213287	0.557193
51	0.165942	0.196263	0.85	0.398	-0.218742	0.550625			51	-0.105523	0.186471	-0.57	0.571	-0.47101	0.259964
52	-0.111595	0.277882	-0.4	0.688	-0.656256	0.433065			52	-0.120549	0.245674	-0.49	0.624	-0.602076	0.360978
61	0.246739	0.178124	1.39	0.166	-0.102392	0.595871			61	0.481828	0.150077	3.21	0.001	0.187674	0.775982
71	0.0303288	0.201464	0.15	0.88	-0.36455	0.425207			71	-0.852048	0.273622	-3.11	0.002	-1.38836	-0.315741
81	0.0128284	0.33683	0.04	0.97	-0.647372	0.673029			81	0.776801	0.225564	3.44	0.001	0.334691	1.21891
91	0.296743	0.276492	1.07	0.283	-0.245193	0.838679			91	0.196518	0.250686	0.78	0.433	-0.294833	0.687869
92	0.55151	0.312634	1.76	0.078	-0.0612656	1.16429			92	0.241818	0.31022	0.78	0.436	-0.366222	0.849858
year									year
2005	0.435232	0.175126	2.49	0.013	0.0919784	0.778486			2005	-0.355838	0.150891	-2.36	0.018	-0.651589	-0.0600877
2006	0.234238	0.180045	1.3	0.193	-0.118656	0.587133			2006	-0.228006	0.145503	-1.57	0.117	-0.513195	0.0571824
2007	0.317696	0.175912	1.81	0.071	-0.0270981	0.662491			2007	-0.162544	0.142224	-1.14	0.253	-0.441306	0.116218
2008	0.330085	0.175674	1.88	0.06	-0.0142437	0.674413			2008	-0.129328	0.139985	-0.92	0.356	-0.403702	0.145045
2009	0.215065	0.195032	1.1	0.27	-0.167206	0.597335			2009	-0.0830382	0.151234	-0.55	0.583	-0.379462	0.213385
quarter									quarter
2	-0.0342239	0.129385	-0.26	0.791	-0.287823	0.219376			2	0.0401488	0.109904	0.37	0.715	-0.175266	0.255563
3	0.0303817	0.128337	0.24	0.813	-0.221165	0.281928			3	-0.104028	0.113714	-0.91	0.36	-0.32691	0.118854
4	0.321071	0.129098	2.49	0.013	0.0680338	0.574108			4	-0.0781345	0.124213	-0.63	0.529	-0.321595	0.165325
Preferential status initially	0.07875	0.108046	0.73	0.466	-0.133024	0.290524			Preferential status initially	0.0660458	0.0878467	0.75	0.452	-0.106136	0.238228
constant	-10.271	1.01778	-10.09	0	-12.2659	-8.27609			constant	-7.71619	0.392403	-19.66	0	-8.48531	-6.94707
* Reference group: age = 65; no partner; province_part = 11; year = 2004; quarter = 1; no preferential status initially
** See sheet "codes-province"

## Sheet: dead
Dependent variable: death									Dependent variable: death
	Sex = M									Sex = F
Number	of	strata	=	40	Number of obs	=	546050		Number	of	strata	=	40	Number of obs	=	722507
Number	of	PSUs	=	30761	Population size	=	546050		Number	of	PSUs	=	38781	Population size	=	722507
					Design df	=	30721							Design df	=	38741
					F( 61, 30661)	=	56.65							F( 61, 38681)	=	59.63
					Prob > F	=	0							Prob > F	=	0
dead	Std. Err.	t	P>t	[95% Conf.	Interval]				dead	Coef.	Std. Err.	t	P>t	[95% Conf.	Interval]
age									age
66	0.377046	0.215035	1.75	0.08	-0.0444317	0.798525			66	-0.290201	0.322936	-0.9	0.369	-0.923164	0.342762
67	0.369428	0.215761	1.71	0.087	-0.0534713	0.792328			67	0.293045	0.293008	1	0.317	-0.281258	0.867348
68	0.458645	0.213227	2.15	0.031	0.0407115	0.876579			68	0.0694472	0.301802	0.23	0.818	-0.522093	0.660987
69	0.576273	0.209833	2.75	0.006	0.164991	0.987555			69	0.701858	0.278003	2.52	0.012	0.156965	1.24675
70	0.871314	0.204231	4.27	0	0.471013	1.27161			70	0.86994	0.273759	3.18	0.001	0.333366	1.40651
71	0.804863	0.206259	3.9	0	0.400586	1.20914			71	0.65392	0.279774	2.34	0.019	0.105557	1.20228
72	1.05482	0.202681	5.2	0	0.657552	1.45208			72	0.769535	0.276956	2.78	0.005	0.226695	1.31238
73	1.00209	0.204131	4.91	0	0.60199	1.4022			73	0.972421	0.272462	3.57	0	0.438389	1.50645
74	1.14684	0.202327	5.67	0	0.750274	1.54341			74	1.00528	0.272116	3.69	0	0.471922	1.53863
75	1.17646	0.202494	5.81	0	0.779565	1.57336			75	1.21297	0.268572	4.52	0	0.686563	1.73938
76	1.15157	0.203699	5.65	0	0.752314	1.55083			76	1.27902	0.26799	4.77	0	0.753753	1.80429
77	1.44734	0.200212	7.23	0	1.05491	1.83976			77	1.59921	0.263966	6.06	0	1.08183	2.11659
78	1.64759	0.198842	8.29	0	1.25785	2.03732			78	1.60292	0.264755	6.05	0	1.084	2.12185
79	1.60023	0.200507	7.98	0	1.20723	1.99323			79	1.70005	0.26413	6.44	0	1.18235	2.21776
80	1.72932	0.200085	8.64	0	1.33715	2.1215			80	1.81156	0.263748	6.87	0	1.29461	2.32851
81	1.98017	0.198028	10	0	1.59203	2.36831			81	2.02672	0.262093	7.73	0	1.51301	2.54043
82	2.01307	0.199064	10.11	0	1.6229	2.40325			82	1.96007	0.263554	7.44	0	1.44349	2.47664
83	2.11887	0.199204	10.64	0	1.72842	2.50932			83	2.15532	0.262507	8.21	0	1.6408	2.66984
84	2.25915	0.199103	11.35	0	1.8689	2.6494			84	2.45254	0.260596	9.41	0	1.94176	2.96331
85	2.36073	0.19995	11.81	0	1.96881	2.75264			85	2.45579	0.261945	9.38	0	1.94237	2.96921
86	2.46737	0.201453	12.25	0	2.07252	2.86223			86	2.74965	0.260968	10.54	0	2.23815	3.26115
87	2.82323	0.200858	14.06	0	2.42954	3.21692			87	2.72192	0.263921	10.31	0	2.20463	3.23921
88	2.87961	0.205262	14.03	0	2.47729	3.28193			88	2.96548	0.264467	11.21	0	2.44712	3.48384
89	2.77239	0.215771	12.85	0	2.34947	3.19531			89	3.19753	0.265581	12.04	0	2.67698	3.71807
90	3.04396	0.217832	13.97	0	2.617	3.47092			90	3.10334	0.273135	11.36	0	2.56799	3.6387
91	2.96231	0.231016	12.82	0	2.5095	3.41511			91	3.35627	0.273258	12.28	0	2.82068	3.89187
92	3.15128	0.232479	13.56	0	2.69561	3.60695			92	3.40605	0.276472	12.32	0	2.86416	3.94794
93	3.10489	0.242011	12.83	0	2.63054	3.57924			93	3.35779	0.281716	11.92	0	2.80562	3.90996
94	3.69626	0.235506	15.69	0	3.23466	4.15786			94	3.64525	0.281509	12.95	0	3.09348	4.19701
95	3.10881	0.2847	10.92	0	2.55079	3.66683			95	3.74927	0.289134	12.97	0	3.18256	4.31598
96	3.60344	0.278873	12.92	0	3.05684	4.15005			96	4.01101	0.295269	13.58	0	3.43228	4.58974
97	3.21544	0.382575	8.4	0	2.46558	3.96531			97	3.75422	0.333425	11.26	0	3.1007	4.40774
98	3.31427	0.399677	8.29	0	2.53089	4.09765			98	4.25304	0.344381	12.35	0	3.57805	4.92804
99	3.70573	0.391241	9.47	0	2.93888	4.47258			99	4.24778	0.38135	11.14	0	3.50033	4.99524
100	3.74644	0.407394	9.2	0	2.94793	4.54495			100	4.11654	0.395396	10.41	0	3.34156	4.89153
partner	-0.262243	0.0339678	-7.72	0	-0.328821	-0.195665			partner	-0.184954	0.0424486	-4.36	0	-0.268155	-0.101754
province_arrondis**									province_arrondis**
13	-0.114146	0.0977402	-1.17	0.243	-0.30572	0.0774292			13	-0.204328	0.120301	-1.7	0.089	-0.440121	0.0314653
21	0.0865908	0.0667507	1.3	0.195	-0.0442433	0.217425			21	0.147678	0.0659144	2.24	0.025	0.0184843	0.276872
23	-0.0339117	0.0797213	-0.43	0.671	-0.190169	0.122345			23	0.0102425	0.0879927	0.12	0.907	-0.162225	0.18271
24	0.148205	0.0812293	1.82	0.068	-0.0110075	0.307418			24	-0.212514	0.101602	-2.09	0.036	-0.411657	-0.0133711
25	0.224862	0.0914921	2.46	0.014	0.0455336	0.40419			25	-0.054919	0.10321	-0.53	0.595	-0.257213	0.147375
31	-0.102877	0.076659	-1.34	0.18	-0.253132	0.0473774			31	-0.233746	0.0891402	-2.62	0.009	-0.408463	-0.0590286
32	-0.114995	0.0889612	-1.29	0.196	-0.289363	0.0593724			32	-0.296367	0.105476	-2.81	0.005	-0.503103	-0.0896316
41	0.130045	0.0697199	1.87	0.062	-0.006609	0.266699			41	-0.123234	0.0812996	-1.52	0.13	-0.282584	0.0361148
42	0.0785945	0.0782616	1	0.315	-0.0748014	0.23199			42	-0.0656262	0.0910835	-0.72	0.471	-0.244152	0.1129
51	0.176265	0.0688771	2.56	0.01	0.0412631	0.311267			51	0.0681341	0.0720997	0.94	0.345	-0.0731831	0.209451
52	0.0886749	0.0920064	0.96	0.335	-0.0916615	0.269011			52	0.112009	0.0930903	1.2	0.229	-0.0704501	0.294469
61	0.22977	0.0632426	3.63	0	0.105812	0.353728			61	0.0935326	0.0663192	1.41	0.158	-0.0364547	0.22352
71	-0.0900039	0.0762249	-1.18	0.238	-0.239408	0.0594			71	-0.0393475	0.0870156	-0.45	0.651	-0.2099	0.131205
81	0.145914	0.113408	1.29	0.198	-0.0763706	0.368199			81	0.0400815	0.123438	0.32	0.745	-0.20186	0.282023
91	0.35801	0.0937818	3.82	0	0.174194	0.541826			91	0.0084737	0.105661	0.08	0.936	-0.198624	0.215571
92	0.293776	0.120391	2.44	0.015	0.0578053	0.529747			92	-0.0167193	0.141037	-0.12	0.906	-0.293156	0.259718
year									year
2005	-0.0070228	0.0649627	-0.11	0.914	-0.134352	0.120307			2005	0.0951168	0.0731943	1.3	0.194	-0.0483458	0.238579
2006	0.179886	0.0621351	2.9	0.004	0.0580985	0.301673			2006	0.130016	0.0719158	1.81	0.071	-0.0109405	0.270973
2007	0.148743	0.0616365	2.41	0.016	0.0279331	0.269553			2007	0.118325	0.0706264	1.68	0.094	-0.0201049	0.256754
2008	0.148207	0.061217	2.42	0.015	0.0282191	0.268195			2008	0.256297	0.068606	3.74	0	0.121828	0.390767
2009	0.200733	0.0650332	3.09	0.002	0.0732649	0.3282			2009	0.342414	0.0717718	4.77	0	0.20174	0.483089
quarter									quarter
2	-0.0929556	0.043869	-2.12	0.034	-0.178941	-0.0069704			2	-0.116569	0.0476856	-2.44	0.015	-0.210034	-0.0231038
3	-0.147291	0.0444507	-3.31	0.001	-0.234416	-0.060166			3	-0.100761	0.0474745	-2.12	0.034	-0.193812	-0.0077095
4	0.0877657	0.0461105	1.9	0.057	-0.0026128	0.178144			4	0.0348386	0.0509519	0.68	0.494	-0.0650284	0.134706
Preferential status initially	0.152102	0.0363676	4.18	0	0.0808197	0.223384			Preferential status initially	0.0945476	0.0360655	2.62	0.009	0.0238582	0.165237
constant	-6.32684	0.20314	-31.15	0	-6.72501	-5.92868			constant	-7.06727	0.266165	-26.55	0	-7.58896	-6.54558
* Reference group: age = 65; no partner; province_part = 11; year = 2004; quarter = 1; no preferential status initially
** See sheet "codes-province"

## Sheet: dead-2
Dependent variable: death									Dependent variable: death
	Sex = M									Sex = F
Number	of	strata	=	40	Number of obs	=	546050		Number	of	strata	=	40	Number of obs	=	722507
Number	of	PSUs	=	30761	Population size	=	546050		Number	of	PSUs	=	38781	Population size	=	722507
					Design df	=	30721							Design df	=	38741
					F( 62, 30660)	=	55.33							F( 62, 38680)	=	58.73
					Prob > F	=	0							Prob > F	=	0
dead	Coef.	Std. Err.	t	P>t	[95% Conf.	Interval]			dead	Std. Err.	t	P>t	[95% Conf.	Interval]
age									age
66	0.379808	0.215092	1.77	0.077	-0.041782	0.801398			66	-0.290081	0.322936	-0.9	0.369	-0.923044	0.342883
67	0.374757	0.215817	1.74	0.082	-0.0482538	0.797769			67	0.292943	0.293005	1	0.317	-0.281354	0.86724
68	0.466463	0.213309	2.19	0.029	0.0483692	0.884557			68	0.0691012	0.301799	0.23	0.819	-0.522433	0.660635
69	0.585911	0.209928	2.79	0.005	0.174443	0.997379			69	0.701125	0.277974	2.52	0.012	0.156289	1.24596
70	0.883547	0.204301	4.32	0	0.483108	1.28398			70	0.86885	0.273684	3.17	0.002	0.332422	1.40528
71	0.819287	0.206318	3.97	0	0.414896	1.22368			71	0.652306	0.279684	2.33	0.02	0.104119	1.20049
72	1.07153	0.202805	5.28	0	0.674029	1.46904			72	0.767416	0.276902	2.77	0.006	0.224681	1.31015
73	1.02148	0.204355	5	0	0.620933	1.42202			73	0.969822	0.272344	3.56	0	0.43602	1.50362
74	1.16914	0.202565	5.77	0	0.772108	1.56618			74	1.00217	0.272027	3.68	0	0.468994	1.53535
75	1.20185	0.20277	5.93	0	0.804413	1.59929			75	1.20936	0.268365	4.51	0	0.683358	1.73536
76	1.17998	0.204041	5.78	0	0.780049	1.5799			76	1.27482	0.267897	4.76	0	0.749731	1.7999
77	1.47923	0.200569	7.38	0	1.08611	1.87235			77	1.59426	0.263873	6.04	0	1.07706	2.11145
78	1.683	0.199292	8.44	0	1.29238	2.07362			78	1.59725	0.264653	6.04	0	1.07852	2.11598
79	1.6394	0.201049	8.15	0	1.24533	2.03347			79	1.69356	0.264081	6.41	0	1.17596	2.21117
80	1.77237	0.200719	8.83	0	1.37895	2.16579			80	1.80418	0.263763	6.84	0	1.2872	2.32116
81	2.02723	0.198777	10.2	0	1.63762	2.41684			81	2.0184	0.262204	7.7	0	1.50447	2.53232
82	2.06434	0.199915	10.33	0	1.6725	2.45618			82	1.95079	0.26369	7.4	0	1.43395	2.46763
83	2.1743	0.200233	10.86	0	1.78184	2.56676			83	2.14508	0.262741	8.16	0	1.6301	2.66006
84	2.31887	0.200262	11.58	0	1.92635	2.71139			84	2.44127	0.260979	9.35	0	1.92974	2.95279
85	2.4248	0.201196	12.05	0	2.03045	2.81915			85	2.44347	0.262533	9.31	0	1.9289	2.95804
86	2.53572	0.202934	12.5	0	2.13796	2.93348			86	2.73622	0.261607	10.46	0	2.22346	3.24897
87	2.89677	0.202492	14.31	0	2.49988	3.29367			87	2.70732	0.26483	10.22	0	2.18824	3.22639
88	2.95744	0.206961	14.29	0	2.55179	3.3631			88	2.94958	0.265526	11.11	0	2.42914	3.47002
89	2.85806	0.217773	13.12	0	2.43122	3.2849			89	3.18036	0.266651	11.93	0	2.65772	3.703
90	3.14238	0.220312	14.26	0	2.71055	3.5742			90	3.08484	0.274555	11.24	0	2.54671	3.62298
91	3.06758	0.23355	13.13	0	2.60982	3.52535			91	3.33615	0.275204	12.12	0	2.79674	3.87555
92	3.2621	0.235797	13.83	0	2.79993	3.72427			92	3.38442	0.279541	12.11	0	2.83651	3.93233
93	3.22136	0.244841	13.16	0	2.74146	3.70126			93	3.3349	0.284927	11.7	0	2.77644	3.89337
94	3.82376	0.23894	16	0	3.35542	4.29209			94	3.62135	0.284011	12.75	0	3.06468	4.17802
95	3.23941	0.286755	11.3	0	2.67736	3.80146			95	3.72361	0.293056	12.71	0	3.14921	4.298
96	3.75821	0.282522	13.3	0	3.20446	4.31196			96	3.98367	0.29832	13.35	0	3.39896	4.56839
97	3.38634	0.386736	8.76	0	2.62833	4.14436			97	3.72719	0.337329	11.05	0	3.06602	4.38836
98	3.47607	0.401313	8.66	0	2.68948	4.26266			98	4.22619	0.347959	12.15	0	3.54418	4.90819
99	3.87354	0.400776	9.67	0	3.088	4.65908			99	4.21866	0.384268	10.98	0	3.46549	4.97184
100	3.87474	0.415363	9.33	0	3.06061	4.68886			100	4.08296	0.401053	10.18	0	3.29688	4.86903
partner	-0.259426	0.0338997	-7.65	0	-0.325871	-0.192981			partner	-0.186936	0.0426883	-4.38	0	-0.270606	-0.103266
province_arrondis**									province_arrondis**
13	-0.114511	0.0975236	-1.17	0.24	-0.305661	0.0766393			13	-0.204359	0.120323	-1.7	0.089	-0.440196	0.0314774
21	0.0719672	0.0671958	1.07	0.284	-0.0597392	0.203674			21	0.148811	0.0659445	2.26	0.024	0.0195581	0.278064
23	-0.0305811	0.0796939	-0.38	0.701	-0.186784	0.125622			23	0.0097944	0.0879997	0.11	0.911	-0.162687	0.182276
24	0.152584	0.0810066	1.88	0.06	-0.0061928	0.31136			24	-0.212791	0.101595	-2.09	0.036	-0.411919	-0.0136631
25	0.224362	0.0915461	2.45	0.014	0.044928	0.403796			25	-0.0545831	0.10322	-0.53	0.597	-0.256897	0.14773
31	-0.103281	0.076522	-1.35	0.177	-0.253268	0.0467048			31	-0.233272	0.0891739	-2.62	0.009	-0.408055	-0.0584889
32	-0.118836	0.0888517	-1.34	0.181	-0.292989	0.0553168			32	-0.295849	0.105487	-2.8	0.005	-0.502606	-0.089091
41	0.129714	0.0696485	1.86	0.063	-0.0067996	0.266228			41	-0.123074	0.0812917	-1.51	0.13	-0.282408	0.0362596
42	0.0777495	0.078243	0.99	0.32	-0.07561	0.231109			42	-0.0655157	0.0910823	-0.72	0.472	-0.244039	0.113008
51	0.171776	0.0689805	2.49	0.013	0.0365718	0.306981			51	0.0684409	0.0720968	0.95	0.342	-0.0728707	0.209753
52	0.0949118	0.0915798	1.04	0.3	-0.0845884	0.274412			52	0.112116	0.0930893	1.2	0.228	-0.0703419	0.294573
61	0.227605	0.0632574	3.6	0	0.103618	0.351593			61	0.0935342	0.0663258	1.41	0.158	-0.0364661	0.223534
71	-0.0883178	0.0760763	-1.16	0.246	-0.23743	0.0607949			71	-0.0390675	0.0870263	-0.45	0.653	-0.209641	0.131506
81	0.144062	0.113225	1.27	0.203	-0.0778625	0.365987			81	0.0401041	0.123481	0.32	0.745	-0.201922	0.28213
91	0.353147	0.0938026	3.76	0	0.16929	0.537004			91	0.0089641	0.105641	0.08	0.932	-0.198095	0.216024
92	0.294127	0.120617	2.44	0.015	0.0577128	0.530541			92	-0.0164367	0.141008	-0.12	0.907	-0.292816	0.259943
year									year
2005	-0.007181	0.0649663	-0.11	0.912	-0.134518	0.120156			2005	0.0950734	0.073194	1.3	0.194	-0.0483886	0.238536
2006	0.180116	0.0621346	2.9	0.004	0.0583294	0.301902			2006	0.129951	0.0719173	1.81	0.071	-0.0110091	0.27091
2007	0.148643	0.0616451	2.41	0.016	0.0278162	0.26947			2007	0.118274	0.0706266	1.67	0.094	-0.0201559	0.256704
2008	0.147767	0.0612288	2.41	0.016	0.027756	0.267778			2008	0.256287	0.0686064	3.74	0	0.121817	0.390757
2009	0.199686	0.0650592	3.07	0.002	0.0721672	0.327205			2009	0.342453	0.0717713	4.77	0	0.20178	0.483127
quarter									quarter
2	-0.0929421	0.0438675	-2.12	0.034	-0.178924	-0.0069599			2	-0.116557	0.0476858	-2.44	0.015	-0.210023	-0.0230921
3	-0.147299	0.0444495	-3.31	0.001	-0.234422	-0.0601766			3	-0.100737	0.0474745	-2.12	0.034	-0.193789	-0.0076862
4	0.087655	0.0461096	1.9	0.057	-0.0027217	0.178032			4	0.0348723	0.0509518	0.68	0.494	-0.0649946	0.134739
Preferential status initially	0.378051	0.0823234	4.59	0	0.216694	0.539408			Preferential status initially	0.0517124	0.0956921	0.54	0.589	-0.135846	0.239271
Interaction variable preferential status * age	-0.0146938	0.0048293	-3.04	0.002	-0.0241593	-0.0052282			Interaction variable preferential status * age	0.0024044	0.0049754	0.48	0.629	-0.0073475	0.0121563
constant	-6.37126	0.203672	-31.28	0	-6.77047	-5.97206			constant	-7.05696	0.266324	-26.5	0	-7.57896	-6.53496
* Reference group: age = 65; no partner; province_part = 11; year = 2004; quarter = 1; no preferential status initially
** See sheet "codes-province"

## Sheet: dead-3
Dependent variable: death									Dependent variable: death
	Sex = M									Sex = F
Number	of	strata	=	40	Number of obs	=	546050		Number	of	strata	=	40	Number of obs	=	722507
Number	of	PSUs	=	30761	Population size	=	546050		Number	of	PSUs	=	38781	Population size	=	722507
					Design df	=	30721							Design df	=	38741
					F( 67, 30655)	=	59.67							F( 67, 38675)	=	58.22
					Prob > F	=	0							Prob > F	=	0
dead	Coef.	Std. Err.	t	P>t	[95% Conf.	Interval]			dead	Coef.	Std. Err.	t	P>t	[95% Conf.	Interval]
age									age
66	0.375426	0.215093	1.75	0.081	-0.0461657	0.797018			66	-0.292114	0.322934	-0.9	0.366	-0.925073	0.340845
67	0.358081	0.215841	1.66	0.097	-0.0649764	0.781138			67	0.288651	0.292983	0.99	0.325	-0.285603	0.862904
68	0.446761	0.213293	2.09	0.036	0.0286971	0.864825			68	0.0631751	0.301814	0.21	0.834	-0.528388	0.654738
69	0.564329	0.209883	2.69	0.007	0.15295	0.975708			69	0.69593	0.27799	2.5	0.012	0.151063	1.2408
70	0.858902	0.204321	4.2	0	0.458423	1.25938			70	0.864518	0.273686	3.16	0.002	0.328087	1.40095
71	0.791312	0.206329	3.84	0	0.386898	1.19573			71	0.646357	0.279735	2.31	0.021	0.0980701	1.19464
72	1.04219	0.202795	5.14	0	0.6447	1.43967			72	0.758395	0.276974	2.74	0.006	0.21552	1.30127
73	0.989014	0.204375	4.84	0	0.58843	1.3896			73	0.958951	0.272378	3.52	0	0.425083	1.49282
74	1.1322	0.202595	5.59	0	0.735099	1.52929			74	0.993461	0.272039	3.65	0	0.460258	1.52666
75	1.16122	0.202788	5.73	0	0.763752	1.5587			75	1.20007	0.268375	4.47	0	0.674045	1.72609
76	1.13975	0.204111	5.58	0	0.73968	1.53981			76	1.26017	0.267895	4.7	0	0.735088	1.78525
77	1.43277	0.200667	7.14	0	1.03946	1.82608			77	1.57601	0.263918	5.97	0	1.05872	2.0933
78	1.6351	0.199271	8.21	0	1.24453	2.02568			78	1.57894	0.264666	5.97	0	1.06019	2.09769
79	1.59255	0.201054	7.92	0	1.19848	1.98663			79	1.67216	0.264098	6.33	0	1.15452	2.1898
80	1.72018	0.200816	8.57	0	1.32658	2.11379			80	1.78292	0.263794	6.76	0	1.26588	2.29997
81	1.96438	0.198941	9.87	0	1.57445	2.35431			81	1.9965	0.262274	7.61	0	1.48243	2.51056
82	1.99219	0.200102	9.96	0	1.59998	2.3844			82	1.92264	0.263798	7.29	0	1.40559	2.43969
83	2.10103	0.200351	10.49	0	1.70834	2.49373			83	2.11536	0.262807	8.05	0	1.60025	2.63047
84	2.24278	0.200401	11.19	0	1.84998	2.63557			84	2.40341	0.261034	9.21	0	1.89178	2.91504
85	2.35134	0.201363	11.68	0	1.95665	2.74602			85	2.40005	0.262589	9.14	0	1.88537	2.91473
86	2.45671	0.203316	12.08	0	2.0582	2.85522			86	2.68646	0.261769	10.26	0	2.17339	3.19954
87	2.81039	0.202865	13.85	0	2.41277	3.20801			87	2.65639	0.264922	10.03	0	2.13714	3.17564
88	2.88739	0.207224	13.93	0	2.48122	3.29356			88	2.89183	0.265815	10.88	0	2.37082	3.41283
89	2.79632	0.218103	12.82	0	2.36883	3.22381			89	3.12154	0.266804	11.7	0	2.5986	3.64449
90	3.0398	0.221201	13.74	0	2.60624	3.47337			90	3.02854	0.27469	11.03	0	2.49015	3.56695
91	2.97544	0.234833	12.67	0	2.51515	3.43572			91	3.27454	0.275518	11.89	0	2.73452	3.81456
92	3.16291	0.236756	13.36	0	2.69886	3.62696			92	3.32439	0.280015	11.87	0	2.77555	3.87323
93	3.13816	0.245678	12.77	0	2.65663	3.6197			93	3.26926	0.285581	11.45	0	2.70952	3.82901
94	3.74653	0.237998	15.74	0	3.28004	4.21301			94	3.53918	0.284188	12.45	0	2.98216	4.09619
95	3.15952	0.284468	11.11	0	2.60195	3.71709			95	3.66208	0.292738	12.51	0	3.08831	4.23586
96	3.69258	0.282284	13.08	0	3.1393	4.24587			96	3.90009	0.297776	13.1	0	3.31644	4.48374
97	3.25946	0.380699	8.56	0	2.51328	4.00565			97	3.64455	0.338297	10.77	0	2.98148	4.30762
98	3.32896	0.410551	8.11	0	2.52426	4.13366			98	4.16908	0.34786	11.98	0	3.48727	4.8509
99	3.75904	0.397675	9.45	0	2.97959	4.5385			99	4.12743	0.389384	10.6	0	3.36423	4.89063
100	3.89115	0.411869	9.45	0	3.08387	4.69843			100	4.00931	0.403919	9.93	0	3.21762	4.801
partner	-0.252702	0.0339518	-7.44	0	-0.319249	-0.186155			partner	-0.184742	0.0426493	-4.33	0	-0.268336	-0.101148
province_arrondis**									province_arrondis**
13	-0.131097	0.0966434	-1.36	0.175	-0.320522	0.0583285			13	-0.207078	0.120495	-1.72	0.086	-0.443251	0.0290958
21	0.0691377	0.0668697	1.03	0.301	-0.0619298	0.200205			21	0.147382	0.0659253	2.24	0.025	0.018167	0.276597
23	-0.0202151	0.0794436	-0.25	0.799	-0.175928	0.135498			23	-0.0049299	0.0878057	-0.06	0.955	-0.177031	0.167171
24	0.139583	0.0819339	1.7	0.088	-0.0210111	0.300177			24	-0.211176	0.101732	-2.08	0.038	-0.410572	-0.0117796
25	0.219039	0.0922397	2.37	0.018	0.0382458	0.399833			25	-0.0690064	0.103114	-0.67	0.503	-0.271113	0.1331
31	-0.106105	0.0765023	-1.39	0.165	-0.256052	0.0438432			31	-0.239634	0.0892722	-2.68	0.007	-0.414609	-0.064658
32	-0.136773	0.0891998	-1.53	0.125	-0.311608	0.0380624			32	-0.303136	0.105868	-2.86	0.004	-0.510639	-0.0956326
41	0.124502	0.0696812	1.79	0.074	-0.0120758	0.26108			41	-0.120469	0.0813011	-1.48	0.138	-0.279822	0.0388827
42	0.0600593	0.0784955	0.77	0.444	-0.0937951	0.213914			42	-0.0626326	0.0910813	-0.69	0.492	-0.241154	0.115889
51	0.170636	0.0683248	2.5	0.013	0.0367162	0.304555			51	0.0670983	0.0721116	0.93	0.352	-0.0742423	0.208439
52	0.0968671	0.0906687	1.07	0.285	-0.0808474	0.274581			52	0.10249	0.093331	1.1	0.272	-0.0804414	0.285421
61	0.221331	0.0629848	3.51	0	0.0978787	0.344784			61	0.0785548	0.0663945	1.18	0.237	-0.0515802	0.20869
71	-0.0958292	0.0757125	-1.27	0.206	-0.244229	0.0525705			71	-0.0410313	0.0868668	-0.47	0.637	-0.211292	0.12923
81	0.144887	0.11301	1.28	0.2	-0.0766173	0.366392			81	0.0356302	0.122372	0.29	0.771	-0.204222	0.275483
91	0.334658	0.0936606	3.57	0	0.15108	0.518237			91	-0.0060774	0.106063	-0.06	0.954	-0.213964	0.201809
92	0.294228	0.120276	2.45	0.014	0.0584824	0.529973			92	-0.0309384	0.140226	-0.22	0.825	-0.305785	0.243908
year									year
2005	-0.0328858	0.0649702	-0.51	0.613	-0.16023	0.0944584			2005	0.0784359	0.0732461	1.07	0.284	-0.0651283	0.222
2006	0.142374	0.0622417	2.29	0.022	0.0203777	0.264371			2006	0.113551	0.0720713	1.58	0.115	-0.0277102	0.254813
2007	0.0996846	0.0619153	1.61	0.107	-0.021672	0.221041			2007	0.100987	0.0708152	1.43	0.154	-0.037813	0.239786
2008	0.089451	0.0616958	1.45	0.147	-0.0314753	0.210377			2008	0.239321	0.0688692	3.48	0.001	0.104336	0.374307
2009	0.129134	0.0657213	1.96	0.049	0.0003175	0.25795			2009	0.330232	0.0721513	4.58	0	0.188814	0.471651
quarter									quarter
2	-0.0920077	0.0439573	-2.09	0.036	-0.178166	-0.0058496			2	-0.116157	0.0476764	-2.44	0.015	-0.209604	-0.0227099
3	-0.148985	0.0445554	-3.34	0.001	-0.236315	-0.0616544			3	-0.101536	0.0474786	-2.14	0.032	-0.194595	-0.0084766
4	0.076359	0.0461909	1.65	0.098	-0.014177	0.166895			4	0.0324874	0.0510012	0.64	0.524	-0.0674762	0.132451
COPD	0.575366	0.0653468	8.8	0	0.447284	0.703448			COPD	0.164386	0.102304	1.61	0.108	-0.0361327	0.364905
dementia	0.742264	0.0732149	10.14	0	0.598759	0.885768			dementia	0.25159	0.076302	3.3	0.001	0.102036	0.401144
diabetes	-0.51745	0.112653	-4.59	0	-0.738254	-0.296646			diabetes	-0.570416	0.139946	-4.08	0	-0.844713	-0.296118
hip fracture	1.41253	0.0928028	15.22	0	1.23063	1.59442			hip fracture	1.01715	0.0808442	12.58	0	0.858692	1.17561
parki	-0.0851808	0.157673	-0.54	0.589	-0.394226	0.223865			parki	-0.200978	0.201003	-1	0.317	-0.59495	0.192994
Preferential status initially	0.380968	0.0822207	4.63	0	0.219812	0.542124			Preferential status initially	0.0554337	0.0957334	0.58	0.563	-0.132206	0.243074
Interaction variable preferential status * age	-0.0155472	0.0048218	-3.22	0.001	-0.0249982	-0.0060963			Interaction variable preferential status * age	0.0023559	0.0049806	0.47	0.636	-0.0074063	0.012118
constant	-6.33566	0.203602	-31.12	0	-6.73473	-5.93659			constant	-7.04064	0.266282	-26.44	0	-7.56255	-6.51872
* Reference group: age = 65; no partner; province_part = 11; year = 2004; quarter = 1; no preferential status initially
** See sheet "codes-province"

## Sheet: summary
Dep. variable	model	Men					Women
		Est.	St.error	t-value	Sign.		Est.	St.error	t-value	Sign.
COPD		0.317043	0.0455333	6.96	0		0.250117	0.0809269	3.09	0.002
Dementia		0.0744707	0.0643418	1.16	0.247		0.125067	0.0987441	1.27	0.205
Diabetes		0.237315	0.058649	4.05	0		0.38148	0.0910932	4.19	0
Hip fracture		-0.0232643	0.0880422	-0.26	0.792		0.0736862	0.108211	0.68	0.496
Parkinson's disease		0.07875	0.108046	0.73	0.466		0.27326	0.1906	1.43	0.152
Death		0.152102	0.0363676	4.18	0		0.0945476	0.0360655	2.62	0.009
Death	interaction with age
	dummy preferential status:	0.378051	0.0823234	4.59	0		0.0517124	0.0956921	0.54	0.589
	interaction variable:	-0.0146938	0.0048293	-3.04	0.002		0.0024044	0.0049754	0.48	0.629
Death	with chronic conditions and
	interaction with age
	dummy preferential status:	0.380968	0.0822207	4.63	0		0.0554337	0.0957334	0.58	0.563
	interaction variable:	-0.0155472	0.0048218	-3.22	0.001		0.0023559	0.0049806	0.47	0.636

## Sheet: codes-province
Code	Province or arrondissement
11	Antwerpen and Mechelen
13	Turnhout
21	Brussels
23	Halle-Vilvoorde
24	Leuven
25	Nivelles
31	West-Flanders-Coast
32	West-Flanders-Interior
41	Gent-Aalst
42	East-Flanders-other
51	Charleroi-Mons-Soignies
52	Hainaut-other
61	Liège
71	Limburg
81	Luxembourg
91	Namur (arrond.)
92	Namur (province) Other

[truncated: 1 more sheets: selections]
